# Supplementary material for: The euchromatic histone mark H3K36me3 preserves heterochromatin through sequestration of an acetyltransferase complex in fission yeast
Source: PubMed Central journal article supplement (PMC7052950; doi:10.15698/mic2020.03.711), 2020-01-03
Supplement: mic-07-080-s01.pdf [file mic-07-080-s01.pdf]

**Figure S1**

H3K9me2 ChIP-qPCR

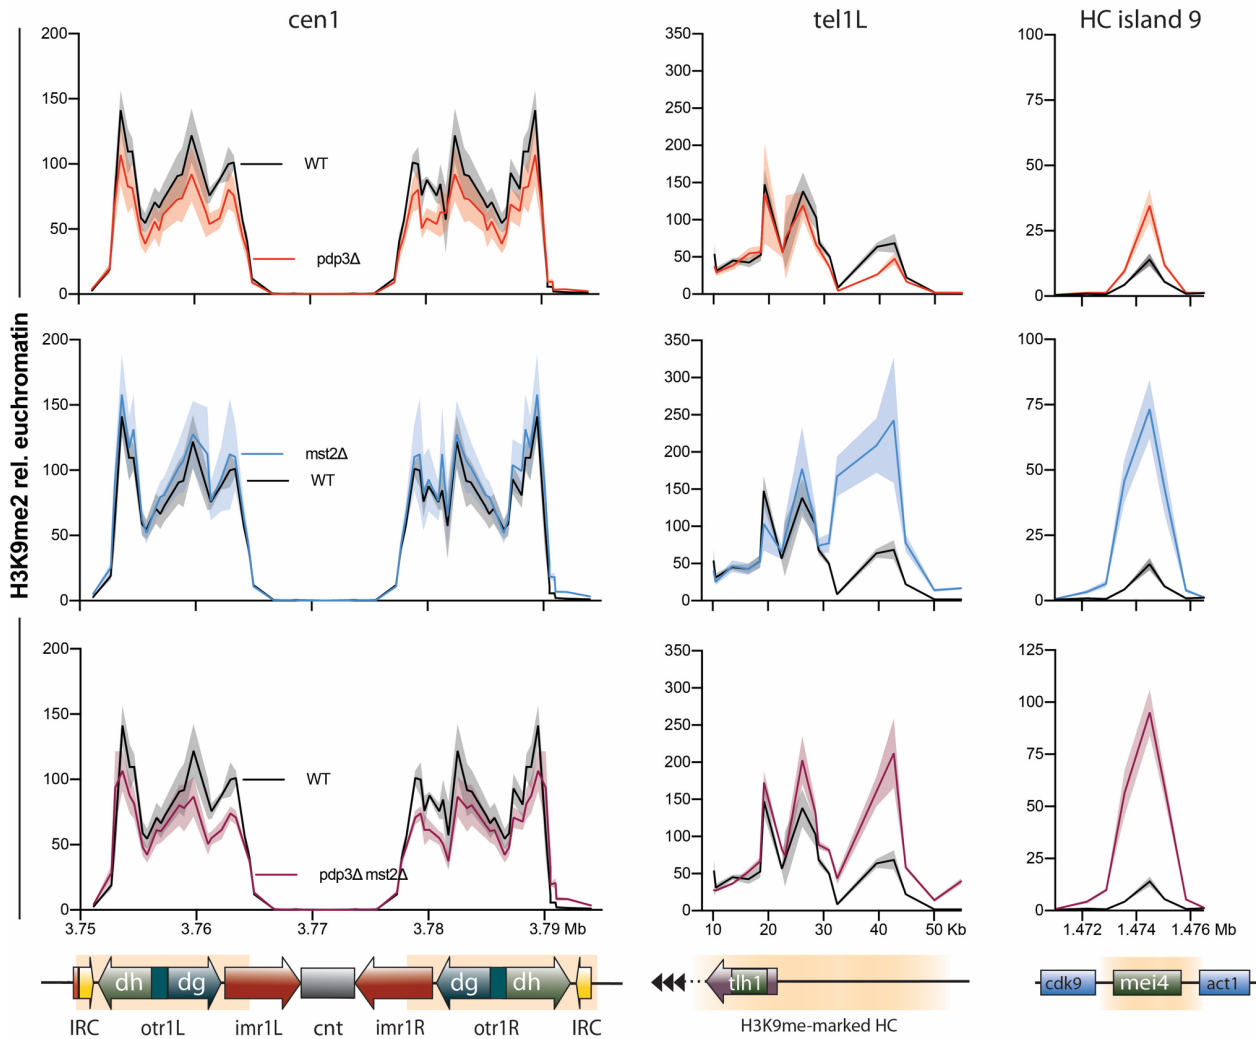

**Maintenance and assembly of H3K9me2 at constitutive heterochromatin, subtelomeric boundaries and facultative heterochromatin.**

ChIP-qPCR experiments depicting H3K9me2 enrichment at pericentromeric heterochromatin of centromere 1, the subtelomeric TEL1L region, and the *mei4<sup>+</sup>* locus, a meiotic island, in *pdp3<sup>+</sup>* and *mst2<sup>+</sup>* single knockouts as well as an *mst2<sup>+</sup> pdp3<sup>+</sup>* double knockout; all data have been normalized to the average of three euchromatic genes (*adf1<sup>+</sup>*, *sam1<sup>+</sup>*, *tif51<sup>+</sup>*); n = 3 ± SEM.

H3K36me3 vs. H3K9me2 ChIP (pericentromeres)

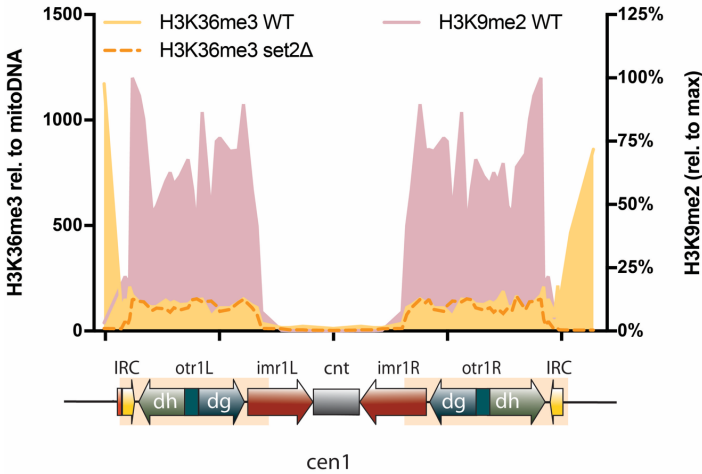

**Figure S2: Cross reactivity analysis of anti-H3K36me3 to H3K9me2**

Shown is a ChIP-qPCR analysis of a representative experiment using tiling primer arrays for H3K36me enrichments in WT and *set2Δ* cells at the pericentromeric region of chromosome 1. H3K36me3 enrichments were normalized to mitochondrial DNA, which is not affected by histone modifiers (left y-axis). For comparison with H3K9me2, a ChIP-qPCR analysis of WT cells ( $n = 3$ ) from Barrales et al. 2016 is shown (H3K9me enrichments normalized to maximal level in heterochromatin, which was set to 100%; right y-axis).

ChIP H2B-K119ub (WT vs. *set2Δ*)

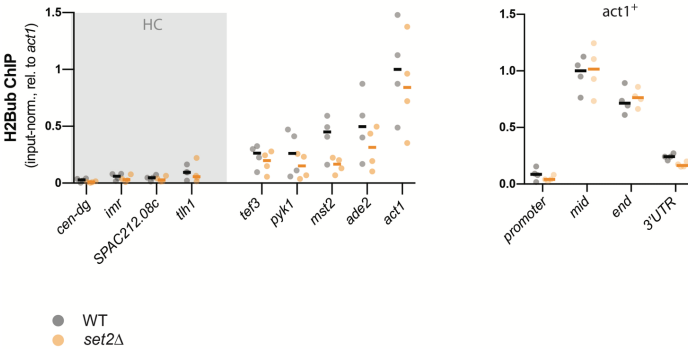

**Figure S3: H2BK119 ubiquitylation at heterochromatin and euchromatin**

ChIP-qPCR analysis for H2B-K119ub in wild-type and *set2Δ* cells. Circles and horizontal lines represent individual data and median from 4 independent experiments. Input-normalized ChIP data are shown relative to the median of the ChIP signals for *act1*<sup>+</sup> (mid).

RT-qPCR subtelomeres

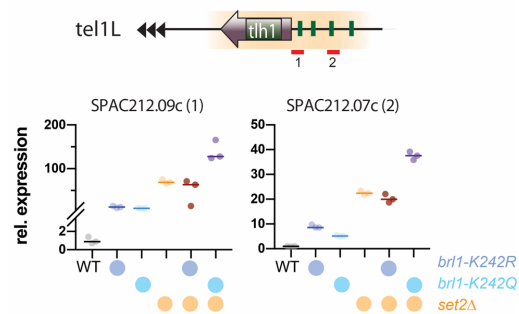

**Figure S4: Subtelomeric transcript levels in mutants affect in Brl1 acetylation.**

RT-qPCR analysis of transcript levels at subtelomeric HC. Data analysis as in Figure 1C ( $n = 3$  individual experiments).

Supplementary Table 1. Yeast strains

| STRAIN                                                                                                                                                                      | SOURCE                  | IDENTIFIER          |
|-----------------------------------------------------------------------------------------------------------------------------------------------------------------------------|-------------------------|---------------------|
| <i>h<sup>+</sup> imr1L(Ncol)::ura4<sup>+</sup> otr1R(SphI)::ade6<sup>+</sup> leu1-32 ura4-DS/E ade6-M210</i>                                                                | (Braun et al., 2011)    | PSB65               |
| <i>h<sup>+</sup> imr1L(Ncol)::ura4<sup>+</sup> otr1R(SphI)::ade6<sup>+</sup> leu1-32 ura4-DS/E ade6-M210 set2Δ::natMX</i>                                                   | This study              | PSB1334             |
| <i>h<sup>-</sup> SPSQ (cyhR) SPL42 (cyhS) hphMX::cen1 imr1L(Ncol)::ura4<sup>+</sup> otr1R(SphI)::ade6<sup>+</sup> leu1-32 ura4-DS/E ade6-M210</i>                           | (Barrales et al., 2016) | PSB582              |
| <i>h<sup>-</sup> SPSQ (cyhR) SPL42 (cyhS) hphMX::cen1 imr1L(Ncol)::ura4<sup>+</sup> otr1R(SphI)::ade6<sup>+</sup> leu1-32 ura4-DS/E ade6-M210 pdp3Δ::natMX</i>              | (Flury et al., 2017)    | PSB689              |
| <i>h<sup>-</sup> SPSQ (cyhR) SPL42 (cyhS) hphMX::cen1 imr1L(Ncol)::ura4<sup>+</sup> otr1R(SphI)::ade6<sup>+</sup> leu1-32 ura4-DS/E ade6-M210 mst2Δ::natMX</i>              | (Flury et al., 2017)    | PSB1122             |
| <i>h<sup>-</sup> SPSQ (cyhR) SPL42 (cyhS) hphMX::cen1 imr1L(Ncol)::ura4<sup>+</sup> otr1R(SphI)::ade6<sup>+</sup> leu1-32 ura4-DS/E ade6-M210 eaf6Δ::natMX</i>              | This study              | PSB1124             |
| <i>h<sup>-</sup> SPSQ (cyhR) SPL42 (cyhS) hphMX::cen1 imr1L(Ncol)::ura4<sup>+</sup> otr1R(SphI)::ade6<sup>+</sup> leu1-32 ura4-DS/E ade6-M210 nto1Δ::natMX</i>              | This study              | PSB1127             |
| <i>h<sup>-</sup> SPSQ (cyhR) SPL42 (cyhS) hphMX::cen1 imr1L(Ncol)::ura4<sup>+</sup> otr1R(SphI)::ade6<sup>+</sup> leu1-32 ura4-DS/E ade6-M210 ptf1Δ::natMX</i>              | This study              | PSB1128             |
| <i>h<sup>-</sup> SPSQ (cyhR) SPL42 (cyhS) hphMX::cen1 imr1L(Ncol)::ura4<sup>+</sup> otr1R(SphI)::ade6<sup>+</sup> leu1-32 ura4-DS/E ade6-M210 ptf2Δ::natMX</i>              | This study              | PSB1130             |
| <i>h<sup>-</sup> SPSQ (cyhR) SPL42 (cyhS) hphMX::cen1 imr1L(Ncol)::ura4<sup>+</sup> otr1R(SphI)::ade6<sup>+</sup> leu1-32 ura4-DS/E ade6-M210 set2Δ::kanMX</i>              | This study              | PSB2111             |
| <i>h<sup>-</sup> SPSQ (cyhR) SPL42 (cyhS) hphMX::cen1 imr1L(Ncol)::ura4<sup>+</sup> otr1R(SphI)::ade6<sup>+</sup> leu1-32 ura4-DS/E ade6-M210 pdp3Δ::natMX set2Δ::kanMX</i> | This study              | PSB2113             |
| <i>h<sup>-</sup> SPSQ (cyhR) SPL42 (cyhS) hphMX::cen1 imr1L(Ncol)::ura4<sup>+</sup> otr1R(SphI)::ade6<sup>+</sup> leu1-32 ura4-DS/E ade6-M210 nto1Δ::natMX set2Δ::kanMX</i> | This study              | PSB2115             |
| <i>h<sup>-</sup> SPSQ (cyhR) SPL42 (cyhS) hphMX::cen1 imr1L(Ncol)::ura4<sup>+</sup> otr1R(SphI)::ade6<sup>+</sup> leu1-32 ura4-DS/E ade6-M210 mst2Δ::natMX set2Δ::kanMX</i> | This study              | PSB2131             |
| <i>h<sup>-</sup> SPSQ (cyhR) SPL42 (cyhS) hphMX::cen1 imr1L(Ncol)::ura4<sup>+</sup> otr1R(SphI)::ade6<sup>+</sup> leu1-32 ura4-DS/E ade6-M210 eaf6Δ::natMX set2Δ::kanMX</i> | This study              | PSB2321             |
| <i>h<sup>-</sup> SPSQ (cyhR) SPL42 (cyhS) hphMX::cen1 imr1L(Ncol)::ura4<sup>+</sup> otr1R(SphI)::ade6<sup>+</sup> leu1-32 ura4-DS/E ade6-M210 ptf1Δ::natMX set2Δ::kanMX</i> | This study              | PSB2323             |
| <i>h<sup>-</sup> SPSQ (cyhR) SPL42 (cyhS) hphMX::cen1 imr1L(Ncol)::ura4<sup>+</sup> otr1R(SphI)::ade6<sup>+</sup> leu1-32 ura4-DS/E ade6-M210 ptf2Δ::natMX set2Δ::kanMX</i> | This study              | PSB2325             |
| <i>h leu1-32 ura4-D18 ade6-704 trip1+::ade6<sup>+</sup> shade6-250/natMX</i>                                                                                                | (Flury et al., 2017)    | PSB2356<br>(spb426) |

|                                                                                                                                                               |                      |                      |
|---------------------------------------------------------------------------------------------------------------------------------------------------------------|----------------------|----------------------|
| <i>h<sup>-</sup> leu1-32 ura4-D18 ade6-704 trp1<sup>+</sup>::ade6<sup>+</sup> nmt1<sup>+</sup>::ade6-hp<sup>+</sup>::natMX brl1-K242R</i>                     | (Flury et al., 2017) | PSB2357<br>(spb2982) |
| <i>h<sup>-</sup>, leu1-32, ura4-D18, ade6-704, trp1<sup>+</sup>::ade6<sup>+</sup>, nmt1<sup>+</sup>::ade6-hp<sup>+</sup>::natMX, brl1-K242Q</i>               | (Flury et al., 2017) | PSB2358<br>(spb2983) |
| <i>h leu1-32 ura4-D18 ade6-704 trip1<sup>+</sup>::ade6<sup>+</sup> shade6-250/natMX set2Δ::kanMX</i>                                                          | This study           | PSB2361              |
| <i>h<sup>-</sup> leu1-32 ura4-D18 ade6-704 trp1<sup>+</sup>::ade6<sup>+</sup> nmt1<sup>+</sup>::ade6-hp<sup>+</sup>::natMX brl1-K242R set2Δ::kanMX</i>        | This study           | PSB2363              |
| <i>h<sup>-</sup>, leu1-32, ura4-D18, ade6-704, trp1<sup>+</sup>::ade6<sup>+</sup>, nmt1<sup>+</sup>::ade6-hp<sup>+</sup>::natMX, brl1-K242Q, set2Δ::kanMX</i> | This study           | PSB2365              |

Supplementary Table 2. Oligonucleotides for Figures 1-4

| TARGET                        | SEQUENCE               | IDENTIFIER |
|-------------------------------|------------------------|------------|
| <i>cen-dg</i> forward         | TGCTCTGACTTGGCTTGTCTT  | Sg1020     |
| <i>cen-dg</i> reverse         | CCCTAAGTTGGAAAGGCACA   | Sg1021     |
| <i>cen-dh</i> forward         | TGAATCGTGTCACCTCAACCC  | Sg1022     |
| <i>cen-dh</i> reverse         | CGAAACTTTCAGATCTCGCC   | Sg1023     |
| <i>act1+</i> (IV) forward     | GATTCTCATGGAGCGTGGTT   | Sg1028     |
| <i>act1+</i> (IV) reverse     | CGCTCGTTTCCGATAGTGAT   | Sg1029     |
| <i>act1+</i> (V) forward      | AACCCTCAGCTTTGGGTCTT   | Sg1030     |
| <i>act1+</i> (V) reverse      | TTTGCATACGATCGGCAATA   | Sg1031     |
| <i>ura4+</i> forward          | CAGCAATATCGTACTCCTGAA  | Sg1026     |
| <i>ura4+</i> reverse          | ATGCTGAGAAAGTCTTTGCTG  | Sg1027     |
| <i>mst2+</i> forward          | GCTTGGATCACCTGAAAAGC   | Sg1730     |
| <i>mst2+</i> reverse          | CATCGTCGCATACCATAGATGT | Sg1731     |
| <i>ade2+</i> forward          | AGGCATCTGATCCCAATGAG   | Sg2670     |
| <i>ade+</i> reverse           | ATTTTGGATGCCTTGGATGA   | Sg2671     |
| <i>tef3+</i> forward          | TGGCCTTCTTAGCCTTTTCA   | Sg2736     |
| <i>tef3+</i> reverse          | CTGAGGAAGTTTGGGCTGTC   | Sg2737     |
| <i>eno102+</i> (I) forward    | AGCAGGTTGGGGATTGATGG   | Sg2759     |
| <i>eno102+</i> (I) reverse    | CAGCTTCTAGCCCAACAGCT   | Sg2760     |
| <i>gal1+</i> (I) forward      | TTATGGAGCCAGAACGACGG   | Sg2765     |
| <i>gal1+</i> (I) reverse      | GATGTACCGCAGATCCACCC   | Sg2766     |
| <i>gal7+</i> (I) forward      | CCACCGTTGTTGAGATCAGC   | Sg2772     |
| <i>gal7+</i> (I) reverse      | AGTGCTTGTTCACTGGTCA    | Sg2773     |
| <i>gal10+</i> (I) forward     | GAGTTTCAAAGTCGCAGCGG   | Sg2778     |
| <i>gal10+</i> (I) reverse     | GGGAGAATTTTCGACCTCGCA  | Sg2779     |
| <i>SPAC977.15</i> (I) forward | TGTGCGCATCCATCTCTTCT   | Sg2790     |
| <i>SPAC977.15</i> (I) reverse | CCAAGCATCAACTTCCTCAGG  | Sg2791     |

|                                 |                      |        |
|---------------------------------|----------------------|--------|
| <i>tlh1+/tlh2+ (VI)</i> forward | TGCCCCGTACGCTTATCTAC | Sg2940 |
| <i>tlh1+/tlh2+ (VI)</i> reverse | TTGCCTTTCTAGCCCATGAC | Sg2941 |
| <i>SPAC212.09c</i> forward      | TCCTTCAGAAATGGCTTGCT | Sg2942 |
| <i>SPAC212.09c</i> reverse      | GCATGTGTGTTATCCCGTTG | Sg2943 |
| <i>SPAC212.08c</i> forward      | TAATGAGTTGCCCCGGGTAT | Sg2944 |
| <i>SPAC212.08c</i> reverse      | CCGAATGGCAAGATGGTAAT | Sg2945 |
| <i>pyk1+</i> forward            | ACGGAAGATGGAGGTGTGAC | N/A    |
| <i>pyk1+</i> reverse            | CCCGTCATCTACGAGAAGGA | N/A    |

Supplementary Table 3: Oligonucleotides for Figure S1

| TARGET                    | SEQUENCE                 | IDENTIFIER |
|---------------------------|--------------------------|------------|
| mitochondrial DNA forward | ACCAGTACACGAACACGCATT    | Sg1742     |
| mitochondrial DNA reverse | ATCCTTCAATCTCCCTCTCCA    | Sg1743     |
| IRC-L/R_alt1 forward      | TGTCAAGGGAAAAACCGAGA     | HC plate   |
| IRC-L/R_alt2 forward      | CCCTTGAAGTTTGCCAAAA      | HC plate   |
| ICR-L/R_alt3 forward      | CCCGCAAAACCATAAAATGT     | HC plate   |
| IRC-L4 forward            | TCGTTAGCATTGGCTTTGA      | HC plate   |
| IRC-L2 forward            | AACCCAAGCAGATAGACTGAAA   | HC plate   |
| cen01 forward             | GCAAAGATCGAACGAGTTGTC    | HC plate   |
| cen06 forward             | TTACCAAATTTGTCAAACGTAAAT | HC plate   |
| cen07 forward             | TGAGGTTTTTCGTTCTTAGGG    | HC plate   |
| cen08 forward             | TGGACACCACTCTTGCCATA     | HC plate   |
| cen10 forward             | GGCATTGTAAGCGGAAAT       | HC plate   |
| cen12 forward             | CAGCTTCTGTACTCACTCACTCA  | HC plate   |
| cen16 forward             | ATCACGCTTCCTTAGCATGG     | HC plate   |
| cen17 forward             | ACATTGCTCCGGTGATTTTC     | HC plate   |
| cen18 forward             | AACCACCACCATGCTCTTTT     | HC plate   |
| cen19 forward             | TGCGGTCATTTAAAGGCATA     | HC plate   |
| cen20 forward             | CCCATGATGTCGTTGGTTAAA    | HC plate   |
| cen21 forward             | ATTTCGCTTTGGCAAAACAT     | HC plate   |

| TARGET                    | SEQUENCE                  | IDENTIFIER |
|---------------------------|---------------------------|------------|
| mitochondrial DNA forward | ACCAGTACACGAACACGCATT     | Sg1742     |
| mitochondrial DNA reverse | ATCCTTCAATCTCCCTCTCCA     | Sg1743     |
| cen22 forward             | TGGAACCCCTAACTTGGAAA      | HC plate   |
| cen24 forward             | AGAAAATTTCACAACTCCGTTGAT  | HC plate   |
| cen25 forward             | ACAACATGCAATACCGATTGT     | HC plate   |
| cen26 forward             | GCACCGTTTTTCCAAATGTC      | HC plate   |
| cen27 forward             | TCGGAAAATTCATCCTTCAA      | HC plate   |
| cen28 forward             | TGAGGTTTCATGATGGGTTCA     | HC plate   |
| cen29 forward             | CGAAGTATGACCCGAATTGC      | HC plate   |
| cen30 forward             | CGAAAATTGTGTTGTGCCAGT     | HC plate   |
| cen31 forward             | ATGCTCCGTTGCTTATCTCG      | HC plate   |
| cen33 forward             | TTTGCATTCTTATCACTTGGATG   | HC plate   |
| cen34 forward             | GTTTGTGTTGGGGAGACGAA      | HC plate   |
| cen35 forward             | CCTACCGAACGTATGATTAGCA    | HC plate   |
| cen36 forward             | CGATCGATTTCTCTTGGTTTTC    | HC plate   |
| cen37 forward             | CCAAAGCAAATAGTCTAATGATCAA | HC plate   |
| cen38 forward             | CCACCAGACCATTACAAGCA      | HC plate   |
| cen39 forward             | CGTTGAATGTTGTTGCTTTCA     | HC plate   |
| cen40 forward             | CATCTCGACTCGCTTGATGA      | HC plate   |
| cen41 forward             | GTCCTGAATCTTGGCAAACAG     | HC plate   |
| cen42 forward             | GAAATGGGCAACAAGTCGAT      | HC plate   |
| cen43 forward             | TCCACTTGGATGACAGAATCC     | HC plate   |
| IRC-L/R_alt1 forward      | TTGTCACGTTTTGGTTTTCA      | HC plate   |
| IRC-L/R_alt2 forward      | TTTTCCCTTGACAAAGCTGA      | HC plate   |
| ICR-L/R_alt3 forward      | TTGGCAAACCTTCAAGGGAGT     | HC plate   |
| IRC-L/R1 forward          | TGCTGAATGTAACCAACATCA     | HC plate   |
| IRC-R2 forward            | GCAGTGTTTACCAACAAGCGTA    | HC plate   |
| CEN1 RB1 forward          | ATGCGTTTTGCGATTCTCTGC     | Sg1787     |

| TARGET                    | SEQUENCE                     | IDENTIFIER         |
|---------------------------|------------------------------|--------------------|
| mitochondrial DNA forward | ACCAGTACACGAACACGCATT        | Sg1742             |
| mitochondrial DNA reverse | ATCCTTCAATCTCCCTCTCCA        | Sg1743             |
|                           |                              | (mb4719)           |
| IRC-R3                    | TGTGTGTCAAGCAAGAAAGC         | HC plate           |
| CEN1 RB2 forward          | ACACTGCTTATTCTGCACATGA       | Sg1789<br>(mb4721) |
| CEN1 RB3 forward          | AGCCAAACTACATATATTCTCTTCATCG | Sg1791<br>(mb4509) |
| CEN1 RB4 forward          | ACGTACATCTTCGACTAGTTTATCCA   | Sg1793<br>(mb4539) |
| IRC-L/R_alt1 reverse      | TGAAAACCAAACCGTGACAA         | HC plate           |
| IRC-L/R_alt2 reverse      | TTTTCCCTTGACAAAGCTGA         | HC plate           |
| ICR-L/R_alt3 reverse      | TTGGCAAACCTCAAGGGAGT         | HC plate           |
| IRC-L4 reverse            | TGCCATATCGTCTTCCGTCT         | HC plate           |
| IRC-L2 reverse            | TAGGACCGAACTGCCAAAAC         | HC plate           |
| cen01 reverse             | TGAAATTCCATAAACGGGCTA        | HC plate           |
| cen06 reverse             | TGCGTTTTCTTAGTAAAAACCTGAT    | HC plate           |
| cen07 reverse             | GGCAATGTCACAAAGTTTCAA        | HC plate           |
| cen08 reverse             | TTGCGCATCAAGTATTTTGC         | HC plate           |
| cen10 reverse             | TGCTTGTTAGTGTTTGAACGAA       | HC plate           |
| cen12 reverse             | TCGTTCTTGCCTAGCGAAAT         | HC plate           |
| cen16 reverse             | TCATTCGTTGTACCAACTGCT        | HC plate           |
| cen17 reverse             | GGCGTGAATATTGATGTTTTGA       | HC plate           |
| cen18 reverse             | TCGCAACGATTTGAACTGTC         | HC plate           |
| cen19 reverse             | CTGTTGTTGAGTGCTGTGGA         | HC plate           |
| cen20 reverse             | CATGGAGAGCGTATGTTGAAA        | HC plate           |
| cen21 reverse             | GTTTCCCGCCAGTAGATG           | HC plate           |
| cen22 reverse             | TGCTCTGACTTGCTTGTCTT         | HC plate           |
| cen24 reverse             | AGAGTTGCCGCAATTGAAAC         | HC plate           |

| TARGET                    | SEQUENCE                | IDENTIFIER         |
|---------------------------|-------------------------|--------------------|
| mitochondrial DNA forward | ACCAGTACACGAACACGCATT   | Sg1742             |
| mitochondrial DNA reverse | ATCCTTCAATCTCCCTCTCCA   | Sg1743             |
| cen25 reverse             | TCGTTATTGAAACACGAATAGGA | HC plate           |
| cen26 reverse             | AACCATTTCGCATCCATTTTT   | HC plate           |
| cen27 reverse             | TCAGCAATTGTTTCAGAAAATG  | HC plate           |
| cen28 reverse             | TTCGGTCTTTGCAGGACTCT    | HC plate           |
| cen29 reverse             | CCACGGAAAACAAATTACCG    | HC plate           |
| cen30 reverse             | CATTCATCTTGCGTGTCTGC    | HC plate           |
| cen31 reverse             | TCCTCACATTCGACATGACTG   | HC plate           |
| cen33 reverse             | TGTCTACGTACGCCAGTTGC    | HC plate           |
| cen34 reverse             | CGATCAAATCGGTCAGTACG    | HC plate           |
| cen35 reverse             | TGGGATCGCAATTTTTGATT    | HC plate           |
| cen36 reverse             | TCGCGAACATCAGCATTACT    | HC plate           |
| cen37 reverse             | CACGGCGATAAGAAATGGA     | HC plate           |
| cen38 reverse             | CTCGCCTATTTACCGATCCA    | HC plate           |
| cen39 reverse             | AATGACAAAGGTGCCGAATC    | HC plate           |
| cen40 reverse             | TGGGCATTCACGAAACATAG    | HC plate           |
| cen41 reverse             | TACAAGGACTAAGCCCAAGCA   | HC plate           |
| cen42 reverse             | GTTGCGCAAACGAAGTTATG    | HC plate           |
| cen43 reverse             | CAACGCATCTACCTCAGCAG    | HC plate           |
| IRC-L/R_alt1 reverse      | TGTCAAGGGAAAAACCGAGA    | HC plate           |
| IRC-L/R_alt2 reverse      | CCCTTGAAGTTTGCCAAAAA    | HC plate           |
| ICR-L/R_alt3 reverse      | CCCGCAAACCATATAAATGT    | HC plate           |
| IRC-L/R1 reverse          | GCCTCAATTGCCTATTAGTGCT  | HC plate           |
| IRC-R2 reverse            | AGAGAATCGCAAACGCATCT    | HC plate           |
| CEN1 RB1 reverse          | GTGTGAGCGCTAACTTTTGCT   | Sg1788<br>(mb4720) |
| IRC-R3 reverse            | TTCATGTGCAGAATAAGCAGTG  | HC plate           |



| TARGET                    | SEQUENCE                      | IDENTIFIER         |
|---------------------------|-------------------------------|--------------------|
| mitochondrial DNA forward | ACCAGTACACGAACACGCATT         | Sg1742             |
| mitochondrial DNA reverse | ATCCTTCAATCTCCCTCTCCA         | Sg1743             |
| CEN1 RB2 reverse          | TGCCGCATGTGGTAAAGACA          | Sg1790<br>(mb4722) |
| CEN1 RB3 reverse          | TTGGCAGAATGTCTAGGTGTAAACTGTG  | Sg1792<br>(mb4510) |
| CEN1 RB4 reverse          | CTATACTGGCTAACCAACTGATGACATTG | Sg1794<br>(mb4540) |

*Supplementary Table 4. Antibodies*

| ANTIBODY        | SOURCE       | IDENTIFIER  |
|-----------------|--------------|-------------|
| anti-H3K9me2    | Abcam        | Cat# ab1220 |
| anti-H3K36me3   | Abcam        | Cat# ab9050 |
| anti-H3 (ChIP)  | Active Motif | Cat# 61475  |
| anti-H2BK120ub1 | Active Motif | Cat# 39623  |

*Supplementary Table 5. Chemicals, reagents and commercial assays*

| CHEMICAL OR REAGENT                     | SOURCE                          | IDENTIFIER       |
|-----------------------------------------|---------------------------------|------------------|
| 5-Fluoroorotic Acid (5-FOA)             | Thermo Fisher                   | Cat# 207291-8-4  |
| AEBSF (Pefabloc SC) *                   | Roche                           | Cat# 11585916001 |
| ChIP DNA Clean & Concentrator™          | Zymo Research                   | Cat# D5201       |
| cOmplete™ Protease Inhibitor Cocktail   | Roche                           | Cat# 11836145001 |
| Dynabeads Protein G*                    | ThermoFisher/ Life Technologies | Cat# 10009D      |
| Formaldehyde                            | Carl Roth                       | Cat# 4979        |
| G418 sulfate (Geneticin)                | Invitrogen/Life Technologies    | Cat# 10131027    |
| Hygromycin                              | Invitrogen/Life Technologies    | Cat# 10687010    |
| Leupeptin hemisulfate*                  | Carl Roth                       | Cat# CN33        |
| nourseothricin dihydrogen sulfate (NAT) | WERNER BioAgents GmbH           | Cat# 5.0         |
| primaQUANT CYBR Master Mix              | Steinbrenner Laborsysteme       | Cat# SL-9902B    |

|                  |                                 |                 |
|------------------|---------------------------------|-----------------|
| Proteinase K     | Roche                           | Cat# 3115879001 |
| SuperScript III* | ThermoFisher/ Life Technologies | Cat# 18080085   |
| Turbo DNA free   | ThermoFisher/ Life Technologies | Cat# AM1907     |
